# Supplementary material
Source: PubMed Central journal article supplement (PMC3608438)
Supplement: supp_mol.112.083477_Molecular_Pharmacology_supplementary_files.pdf [file supp_mol.112.083477_Molecular_Pharmacology_supplementary_files.pdf]

## Molecular Pharmacology

### Protease-activated receptor (PAR) 1 and PAR4 differentially regulate factor V expression from human platelets

Matthew Duvernay, Summer Young, David Gailani, Jonathan Schoenecker, and Heidi Hamm

A.

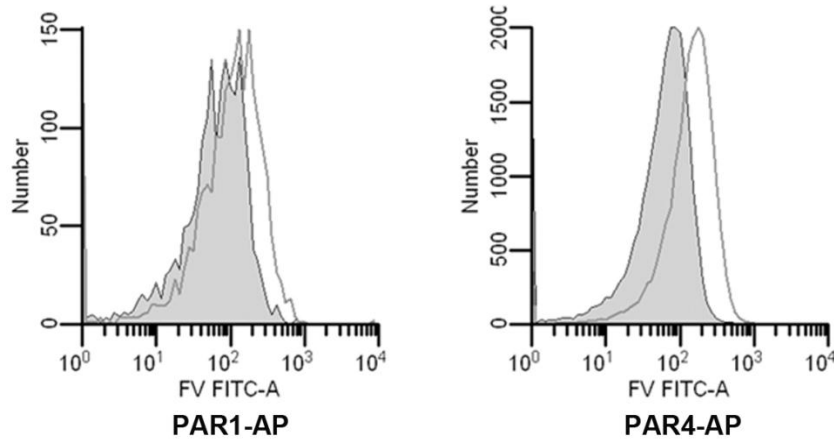

**Supplementary Figure 1** A. FV expression on CD41+/CD62P+ platelet derived microparticles.

Shown are representative histograms of IgG-FITC negative isotype control, black line with grey fill and anti-FV-FITC staining on microparticles from platelets stimulated with 20 μM PAR1-AP or 200 μM PAR4-AP, dark grey line no fill.

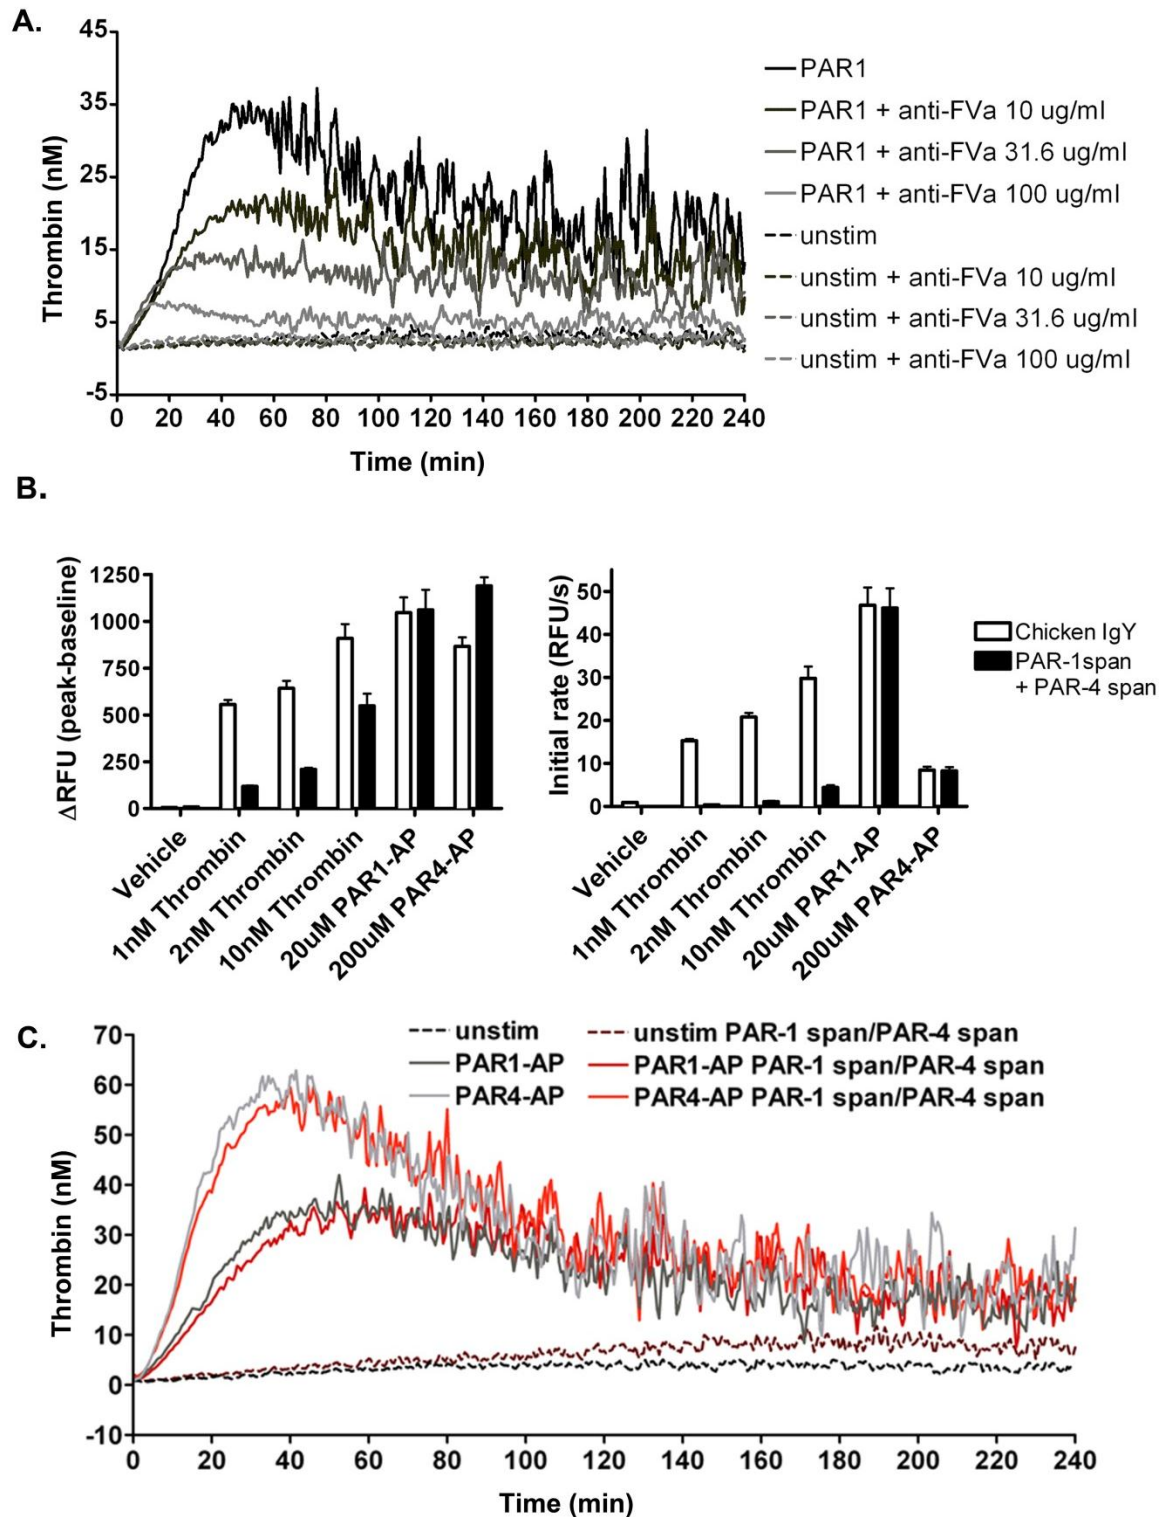

**Supplementary Figure 2 A.** The effect of increasing doses of anti-FV blocking antibody on thrombin generation. Shown is a representative example of three repeats. **B.** The effect of PAR

cleavage blocking antibodies on intracellular calcium mobilization mediated by thrombin in platelets. Left panel, The effect of PAR-1 span IgY and PAR-4 span IgY thrombin cleavage blocking antibodies on the peak of intracellular calcium mobilization mediated by 1 nM, 2nM, and 10 nM Thrombin, 20  $\mu$ M PAR1-AP and 200  $\mu$ M PAR4-AP. Right panel, The effect of PAR-1 span IgY and PAR-4 span IgY thrombin cleavage blocking antibodies on the initial rate of intracellular calcium mobilization mediated by 1 nM, 2nM, and 10 nM Thrombin, 20  $\mu$ M PAR1-AP and 200  $\mu$ M PAR4-AP. C. The effect of PAR-1 span IgY and PAR-4 span IgY thrombin cleavage blocking antibodies on platelet thrombin generation initiated with 20  $\mu$ M PAR1-AP or 200  $\mu$ M PAR4-AP. Grey lines, no antibody; Red lines, + PAR-1 span IgY and PAR-4 span IgY. Shown is a representative example of two repeats.
